# Supplementary material for: Impact of emotional and motivational regulation on putting performance: a frontal alpha asymmetry study
Source: PeerJ. 2019 Apr 26;7:e6777. doi: 10.7717/peerj.6777 (PMC6487804; doi:10.7717/peerj.6777)
Supplement: Dataset S2 [file peerj-07-6777-s002.xlsx]

## Sheet: Data 1
Gender	Age	Best Handicap	Experience(years)	holed/40putts	Successful performance(trials)	Unsuccessful performance(trials)
M	20.53	-4	5	11	10	16
M	21.53	-2	6	9	6	23
M	19.67	-3	7	16	9	15
F	20.06	-4	10	18	9	12
M	20.75	1	8	16	10	13
M	20.6	-3	6	16	11	12
F	24.5	-3	11	13	11	14
M	19.44	-2	5	8	5	24
F	23.03	-3	10	12	9	17
M	20.54	-7	7	22	9	15
M	20.96	-3	9	18	6	23
F	19.42	1	4.5	12	8	13
M	17.51	-6	5.5	8	10	17
M	17.85	-5	7	9	9	20
M	19.85	-3	10	13	5	28
M	17.73	-8	13	14	5	24
M	18.67	-1	9	24	12	7
M	20.22	-3	8	15	6	26
M	18.43	-2	4	4	6	27
M	20.37	1	9	12	6	22
