# Supplementary material for: Impact of emotional and motivational regulation on putting performance: a frontal alpha asymmetry study
Source: PeerJ. 2019 Apr 26;7:e6777. doi: 10.7717/peerj.6777 (PMC6487804; doi:10.7717/peerj.6777)
Supplement: Supplemental Information 3 — The left side of data is the original value, and the right side of data is frontal alpha asymmetry data. T1:-2- -1 s; T2:-1- 0 s; F3: left side of the frontal lobe; F4: right side of the frontal lobe. Success: successful trials which were putted into the hole; Unsuccessful: unsuccessful trials which were not putted into the hole. [file peerj-07-6777-s003.xlsx]

## Sheet: Figure1
		F4-F3
		Successful		Unsuccessful
		T1	T2	T1	T2
	1	-0.45	0.27	-0.19	-0.02
	2	-0.06	0.1	0.07	0.21
	3	-0.17	0.2	0.14	-0.15
	4	0.03	0.14	0.15	0.05
	5	-0.37	-0.11	0.2	0.06
	6	-0.13	0.02	0	0.08
	7	-0.07	-0.11	-0.09	-0.24
	8	-0.07	-0.12	-0.01	-0.09
	9	-0.03	0.29	-0.2	0.29
	10	0.04	0.1	0.15	0.06
	11	-0.09	-0.12	0.03	0.04
	12	-0.1	0.14	0.27	-0.42
	13	-0.16	-0.24	-0.16	-0.27
	14	-0.19	-0.18	0.02	-0.21
	15	0.01	-0.23	0.23	0.06
	16	0.26	-0.07	0.39	-0.15
	17	0.2	0.18	0.52	0.19
	18	-0.59	-0.08	-0.38	-0.2
	19	-0.32	0.16	0.19	0.04
	20	0.06	0.29	-0.14	-0.1
